# Supplementary material for: Cathelicidins PMAP-36, LL-37 and CATH-2 are similar peptides with different modes of action
Source: PubMed Central journal article supplement (PMC6423055; doi:10.1038/s41598-019-41246-6), 2019-03-18
Supplement: 41598_2019_41246_MOESM1_ESM.pdf [file 41598_2019_41246_MOESM1_ESM.pdf]

## **Supplementary files**

### **Cathelicidins PMAP-36, LL-37 and CATH-2 are similar peptides with different modes of action**

*Maike R. Scheenstra,<sup>1,#</sup> Matthias van den Belt, Johanna L.M. Tjeerdsma-van Bokhoven,  
Viktoria A.F. Schneider, Soledad R. Ordonez, Albert van Dijk, Edwin J.A. Veldhuizen, Henk P.  
Haagsman.*

<sup>1</sup>Department of Infectious Diseases and Immunology, Division of Molecular Host Defence, Faculty of Veterinary Medicine,  
Utrecht University, Utrecht, The Netherlands

#### **Footnotes**

<sup>#</sup>To whom correspondence may be addressed. E-mail: [m.r.scheenstra@uu.nl](mailto:m.r.scheenstra@uu.nl). Telephone: +31302531141.

**A****Cell viability***3D4/31 cells*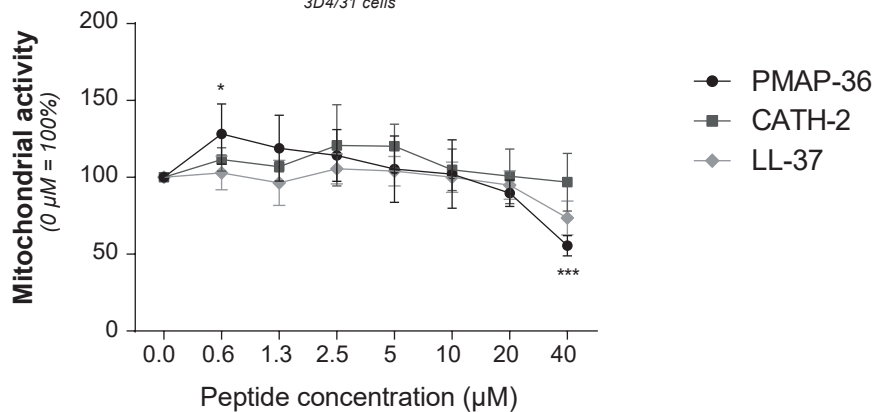**B****Cell viability***Porcine granulocytes*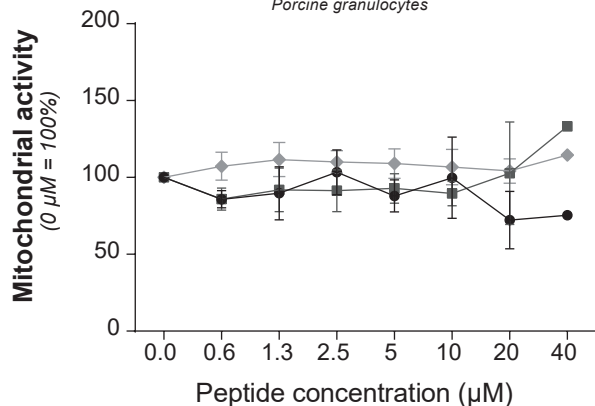**Cell viability***Porcine PBMCs*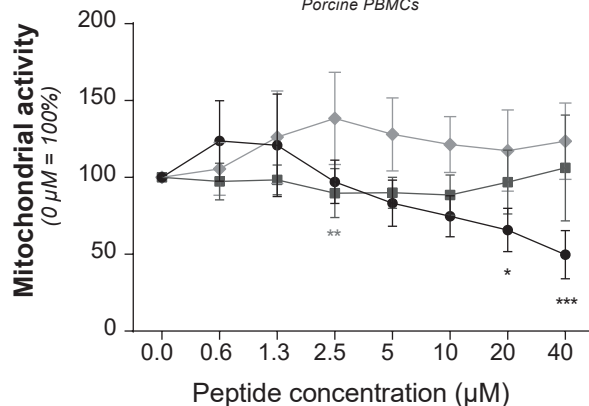

**Supplementary Figure 1. Cytotoxic effect of PMAP-36, CATH-2 and LL-37 against a porcine cell line and primary cells**

Cytotoxic effects against a porcine macrophage-like cell line, 3D4/31 cells, were tested using a WST-1 assay, indicating cell viability. No peptide control was set to 100% cell viability (A). Cytotoxic effects of PMAP-36, CATH-2 and LL-37 against freshly isolated primary cells. Granulocytes and PBMCs were isolated from blood, using Ficoll-Paque Plus separation and red blood cell lysis (B). Data is plotted as average  $\pm$  s.d. (3D4/31 cells N=4, granulocytes N=3, PBMCs N=6). Samples were compared to the no peptide control, using two-way ANOVA with the Bonferroni post-hoc test. (\*= $p \leq 0.05$ ; \*\*= $p \leq 0.01$ ; \*\*\*= $p \leq 0.001$ ; \*\*\*\*= $p \leq 0.0001$ ; black - PMAP-36; dark gray - CATH-2; light gray - LL-37)

**A**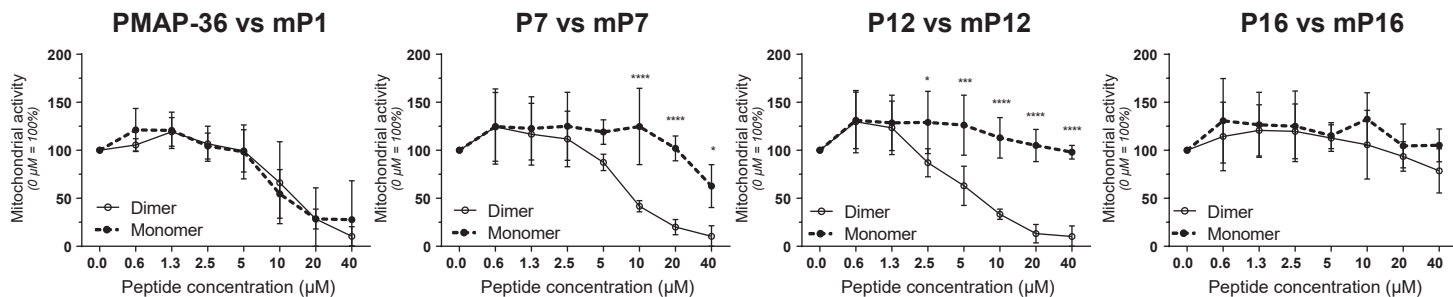**B**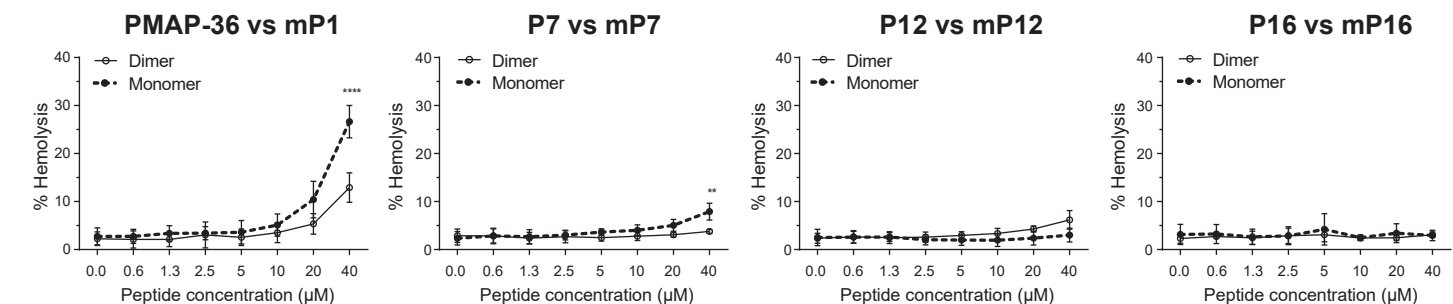**C**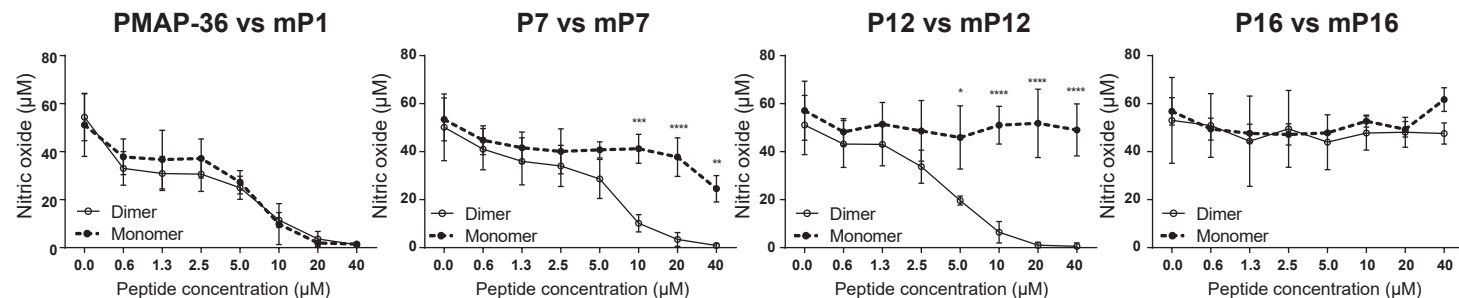

### Supplementary Figure 2. Cytotoxic, hemolytic and LPS neutralizing and binding capacity of PMAP-36 monomeric analogs

Cytotoxic effects against RAW264.7 cells were tested using a WST-1 assay, indicating cell viability. No peptide control was set to 100% cell viability (A). Hemolytic effect on porcine red blood cells was determined by heme release. The positive control, 0.2% Triton was set to 100% lysis and no peptide control as background lysis (B). The PMAP-36 analogs were tested for their ability to neutralize LPS O111:B4. NO production by RAW264.7 cells is depicted (C). Data is plotted as average  $\pm$  s.d. with N=3. Results of monomeric peptides were compared to its dimeric equivalent peptides (molarity calculated for monomer peptides), using two-way ANOVA with the Bonferroni post-hoc test. (\*= $p \leq 0.05$ ; \*\*= $p \leq 0.01$ ; \*\*\*= $p \leq 0.001$ ; \*\*\*\*= $p \leq 0.0001$ )
